# Supplementary material
Source: PubMed Central journal article supplement (PMC6392067)

SatFA (blue)

PC

PE

PUFA (Silver)

PC

$$Q_{\text{Sat}} = -0.56 \pm 0.01$$

$$Q_{\text{Sat}} = -0.26 \pm 0.01$$

PE

$$Q_{\text{Sat}} = -0.44 \pm 0.02$$

$$Q_{\text{Sat}} = -0.28 \pm 0.03$$

5 nm

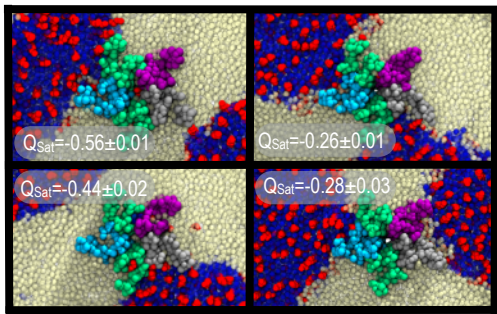

Supplement: NIHMS1519178-supplement-2.pdf [file NIHMS1519178-supplement-2.pdf]
